# Supplementary material
Source: MDPI journal article supplement (https://www.mdpi.com/1424-2818/15/4/579)
Supplement: s1 [file s1]

Supplementary Tables :

Supplementary Table S1: Summary of the information regarding samples and methods used in each PVC-dedicated study

| Study                      | Site                                            | PVC matrix        | Immersion conditions (depth)                                      | DNA extraction method (quantity of plastic used for DNA extraction) | Volume of seawater (control)    |
|----------------------------|-------------------------------------------------|-------------------|-------------------------------------------------------------------|---------------------------------------------------------------------|---------------------------------|
| Pollet et al. 2018 [29]    | Toulon                                          | panels (5 x 5 cm) | subsurface (50cm-1m depth)                                        | PowerBiofilm DNA isolation Kits (3 panels / time point)             | Not sampled                     |
| Catao et al. 2021 [45]     | Toulon<br>Banyuls-sur-Mer<br>Lorient<br>Le Port | panels (5 x 5 cm) | subsurface (50cm-1m depth)                                        | Power Soil DNA isolation kit (3 panels / time point)                | 2L                              |
| Lemonnier et al. 2020 [46] | Brest                                           | pellets (Ø 4 mm)  | subtidal or intertidal (water column or water-sediment interface) | phenol chloroform extraction (3 x 10 pellets / time point)          | 2L (not analyzed in this study) |

Table S2 : Number of reads before and after processing, number of ASVs, and alpha diversity index values for each sample for the ITS2 dataset (natural settings)

| Localisation | Environment | Samples   | Incubation time (days) | Reads before processing | Reads after processing | ASV | Chao1 | Shannon | InvSimpson | Pielou |
|--------------|-------------|-----------|------------------------|-------------------------|------------------------|-----|-------|---------|------------|--------|
| Brest        | PVC         | BES_78_1  | T7                     | 200316                  | 155453                 | 22  | 22    | 1.74    | 4.99       | 0.56   |
|              |             | BES_78_2  |                        | 132024                  | 87190                  | 32  | 32    | 2.13    | 7.36       | 0.61   |
|              |             | BES_186_1 |                        | 69243                   | 48273                  | 72  | 72    | 3.51    | 22.07      | 0.82   |
|              |             | BES_186_2 |                        | 183422                  | 111725                 | 128 | 128   | 3.29    | 14.25      | 0.68   |
|              |             | BES_186_3 |                        | 66525                   | 49751                  | 85  | 85    | 3.27    | 16.13      | 0.74   |
|              |             | BES_81_3  | T35                    | 144692                  | 102169                 | 201 | 201   | 3.15    | 9.09       | 0.59   |
|              |             | BES_69_3  | T42                    | 155292                  | 147013                 | 7   | 7     | 0.07    | 1.02       | 0.04   |
|              |             | BES_72_3  |                        | 137551                  | 126513                 | 18  | 18    | 0.89    | 1.80       | 0.31   |
|              |             | BES_135_1 | T63                    | 101554                  | 69318                  | 256 | 256   | 3.74    | 11.26      | 0.67   |

|  |  |           |      |        |        |     |     |      |       |      |
|--|--|-----------|------|--------|--------|-----|-----|------|-------|------|
|  |  | BES_135_2 |      | 210322 | 127453 | 203 | 203 | 3.38 | 11.39 | 0.64 |
|  |  | BES_135_3 |      | 153089 | 117748 | 98  | 98  | 2.54 | 5.06  | 0.55 |
|  |  | BES_138_1 |      | 235780 | 129096 | 132 | 132 | 3.48 | 18.73 | 0.71 |
|  |  | BES_138_2 |      | 17711  | 11600  | 106 | 106 | 3.94 | 27.19 | 0.84 |
|  |  | BES_138_3 |      | 589225 | 151357 | 373 | 373 | 3.90 | 13.95 | 0.66 |
|  |  | BES_123_1 | T70  | 77764  | 56897  | 80  | 80  | 3.30 | 19.46 | 0.75 |
|  |  | BES_123_2 |      | 143432 | 82321  | 156 | 156 | 3.16 | 13.94 | 0.63 |
|  |  | BES_123_3 |      | 135830 | 76063  | 86  | 86  | 2.99 | 9.25  | 0.67 |
|  |  | BES_126_1 |      | 95802  | 65406  | 82  | 82  | 3.13 | 10.27 | 0.71 |
|  |  | BES_126_2 |      | 171387 | 69227  | 146 | 146 | 3.64 | 24.75 | 0.73 |
|  |  | BES_126_3 |      | 71741  | 41607  | 249 | 249 | 3.80 | 15.43 | 0.69 |
|  |  | BES_192_1 | T91  | 176643 | 91750  | 62  | 62  | 3.03 | 13.04 | 0.73 |
|  |  | BES_192_2 |      | 85195  | 52430  | 206 | 206 | 3.85 | 18.34 | 0.72 |
|  |  | BES_192_3 |      | 143001 | 93321  | 100 | 100 | 2.87 | 9.54  | 0.62 |
|  |  | BES_177_1 | T98  | 162692 | 116231 | 49  | 49  | 2.78 | 12.98 | 0.72 |
|  |  | BES_177_2 |      | 129695 | 76749  | 38  | 38  | 2.62 | 10.06 | 0.72 |
|  |  | BES_177_3 |      | 219251 | 165504 | 86  | 86  | 2.83 | 11.30 | 0.64 |
|  |  | BES_180_1 |      | 115684 | 73404  | 98  | 98  | 3.42 | 12.45 | 0.75 |
|  |  | BES_180_2 |      | 222314 | 102015 | 126 | 126 | 3.01 | 7.48  | 0.62 |
|  |  | BES_180_3 |      | 120692 | 65941  | 79  | 79  | 3.45 | 18.98 | 0.79 |
|  |  | BES_222_1 | T140 | 253990 | 99403  | 97  | 97  | 2.56 | 9.36  | 0.56 |
|  |  | BES_222_2 |      | 251710 | 163140 | 63  | 63  | 2.78 | 10.26 | 0.67 |
|  |  | BES_222_3 |      | 229332 | 146992 | 35  | 35  | 2.72 | 11.14 | 0.77 |
|  |  | BES_207_1 | T147 | 64310  | 36863  | 50  | 50  | 2.83 | 9.24  | 0.72 |
|  |  | BES_207_2 |      | 246746 | 149854 | 148 | 148 | 3.42 | 10.83 | 0.68 |

|        |     |            |     |        |        |     |     |      |       |      |
|--------|-----|------------|-----|--------|--------|-----|-----|------|-------|------|
|        |     | BES_207_3  |     | 209604 | 119174 | 50  | 50  | 3.04 | 10.40 | 0.78 |
|        |     | BES_210_1  |     | 169482 | 98596  | 151 | 151 | 3.85 | 26.58 | 0.77 |
|        |     | BES_210_2  |     | 208557 | 109374 | 119 | 119 | 3.12 | 10.01 | 0.65 |
|        |     | BES_210_3  |     | 136848 | 78339  | 181 | 181 | 3.65 | 16.45 | 0.70 |
| Toulon | PVC | TLN_T1_1   | T1  | 143040 | 79557  | 78  | 78  | 2.66 | 6.36  | 0.61 |
|        |     | TLN_T1_2   |     | 201550 | 122459 | 63  | 63  | 2.90 | 9.64  | 0.70 |
|        |     | TLN_T1_3   |     | 167204 | 98279  | 48  | 48  | 2.94 | 11.02 | 0.76 |
|        |     | TLN_T4_1   | T4  | 193168 | 120382 | 162 | 162 | 3.67 | 17.02 | 0.72 |
|        |     | TLN_T4_2   |     | 152167 | 94211  | 78  | 78  | 3.42 | 19.09 | 0.78 |
|        |     | TLN_T4_3   |     | 199805 | 121734 | 73  | 73  | 3.54 | 23.13 | 0.83 |
|        |     | TLN_T8_1   | T8  | 109357 | 62969  | 91  | 91  | 3.02 | 11.62 | 0.67 |
|        |     | TLN_T8_2   |     | 88462  | 54996  | 149 | 149 | 3.54 | 13.83 | 0.71 |
|        |     | TLN_T8_3   |     | 144780 | 93558  | 84  | 84  | 2.82 | 7.43  | 0.64 |
|        |     | TLN_T12_1  | T12 | 201165 | 112588 | 70  | 70  | 3.07 | 11.93 | 0.72 |
|        |     | TLN_T12_2  |     | 216428 | 135835 | 80  | 80  | 2.93 | 8.36  | 0.67 |
|        |     | TLN_T12_3  |     | 151597 | 92392  | 103 | 103 | 3.35 | 13.62 | 0.72 |
|        |     | TLN_T20_1  | T20 | 207736 | 135394 | 111 | 111 | 2.75 | 5.78  | 0.58 |
|        |     | TLN_T20_2  |     | 175009 | 91797  | 110 | 110 | 3.23 | 11.19 | 0.69 |
|        |     | TLN_T20_3  |     | 157513 | 87980  | 110 | 110 | 2.92 | 5.46  | 0.62 |
|        |     | TLN_T28_1  | T28 | 158450 | 108063 | 50  | 50  | 2.21 | 4.21  | 0.56 |
|        |     | TLN_T28_2  |     | 146507 | 98462  | 59  | 59  | 2.41 | 4.51  | 0.59 |
|        |     | TLN_T28_3  |     | 201929 | 141508 | 58  | 58  | 2.35 | 4.84  | 0.58 |
|        |     | TLN_BIOP_1 | T30 | 200787 | 126870 | 50  | 50  | 2.35 | 6.51  | 0.60 |
|        |     | TLN_BIOP_2 |     | 159262 | 94051  | 39  | 39  | 2.61 | 7.37  | 0.71 |
|        |     | TLN_BIOP_3 |     | 199219 | 122106 | 87  | 87  | 3.33 | 15.52 | 0.75 |

|         |          |            |      |        |        |     |     |      |       |      |
|---------|----------|------------|------|--------|--------|-----|-----|------|-------|------|
|         |          | TLN_T75_1  | T75  | 168737 | 97947  | 173 | 173 | 4.29 | 34.59 | 0.83 |
|         |          | TLN_T75_2  |      | 167161 | 93658  | 231 | 231 | 3.65 | 8.98  | 0.67 |
|         |          | TLN_T75_3  |      | 192518 | 111284 | 248 | 248 | 4.08 | 14.11 | 0.74 |
|         |          | TLN_T365_1 | T365 | 183257 | 122827 | 406 | 406 | 5.11 | 71.12 | 0.85 |
|         |          | TLN_T365_2 |      | 143293 | 86913  | 347 | 347 | 4.46 | 24.94 | 0.76 |
|         |          | TLN_T365_3 |      | 168497 | 110819 | 225 | 225 | 4.84 | 76.90 | 0.89 |
|         | Seawater | TLN_T0     | T0   | 77967  | 41104  | 28  | 28  | 1.21 | 2.21  | 0.36 |
|         |          | TLN_T1     | T10  | 81393  | 65974  | 16  | 16  | 0.93 | 2.19  | 0.33 |
|         |          | TLN_T2     | T20  | 91315  | 49482  | 24  | 24  | 0.88 | 2.06  | 0.28 |
|         |          | TLN_T3     | T30  | 100622 | 69350  | 22  | 22  | 1.18 | 2.97  | 0.38 |
| Lorient | PVC      | LRN_BIOP_1 | T30  | 141546 | 52311  | 30  | 30  | 1.66 | 4.09  | 0.49 |
|         |          | LRN_BIOP_2 |      | 146319 | 75361  | 21  | 21  | 1.58 | 3.67  | 0.52 |
|         |          | LRN_BIOP_3 |      | 92272  | 50187  | 33  | 33  | 1.99 | 4.93  | 0.57 |
|         | Seawater | LRN_T0     | T0   | 97228  | 76635  | 13  | 13  | 1.66 | 4.33  | 0.65 |
|         |          | LRN_T1     | T10  | 91724  | 67355  | 17  | 17  | 2.15 | 5.43  | 0.76 |
|         |          | LRN_T2     | T20  | 91992  | 59010  | 3   | 3   | 0.67 | 1.67  | 0.61 |
|         |          | LRN_T3     | T30  | 87505  | 74035  | 16  | 16  | 0.27 | 1.09  | 0.10 |
| Le Port | PVC      | REU_BIOP_1 | T30  | 107876 | 61521  | 18  | 18  | 2.01 | 6.42  | 0.69 |
|         |          | REU_BIOP_2 |      | 78571  | 39842  | 16  | 16  | 1.87 | 6.02  | 0.68 |
|         |          | REU_BIOP_3 |      | 77863  | 46923  | 29  | 29  | 1.82 | 4.78  | 0.54 |
|         | Seawater | REU_T0     | T0   | 69252  | 47039  | 11  | 11  | 1.01 | 2.14  | 0.42 |
|         |          | REU_T1     | T10  | 83449  | 67345  | 12  | 12  | 1.17 | 2.72  | 0.47 |
|         |          | REU_2      | T20  | 85036  | 66438  | 16  | 16  | 0.76 | 2.04  | 0.27 |
|         |          | REU_T3     | T30  | 86115  | 62812  | 5   | 5   | 0.17 | 1.08  | 0.11 |
|         | PVC      | BSM_T75_1  | T75  | 189003 | 107733 | 212 | 212 | 4.39 | 43.87 | 0.82 |

|                  |  |           |  |        |        |     |     |      |       |      |
|------------------|--|-----------|--|--------|--------|-----|-----|------|-------|------|
| Banyuls-Sur- Mer |  | BSM_T75_2 |  | 128121 | 74570  | 132 | 132 | 3.98 | 29.38 | 0.81 |
|                  |  | BSM_T75_3 |  | 196977 | 119803 | 155 | 155 | 4.11 | 30.76 | 0.81 |

**Table S3** : Number of reads before and after processing, number of ASVs, and alpha diversity index values for each sample for the 18S dataset (natural settings)

| Localisation | Environment | Samples   | Incubation time (days) | Reads before processing | Reads after processing | ASV | Chao1 | Shannon | InvSimpson | Pielou |
|--------------|-------------|-----------|------------------------|-------------------------|------------------------|-----|-------|---------|------------|--------|
| Brest        | PVC         | BES_78_1  | T7                     | 52117                   | 37518                  | 26  | 26    | 2,31    | 7,10       | 0,71   |
|              |             | BES_78_2  |                        | 107345                  | 64324                  | 12  | 12    | 1,05    | 2,50       | 0,42   |
|              |             | BES_78_3  |                        | 45999                   | 35446                  | 35  | 35    | 2,50    | 7,83       | 0,70   |
|              |             | BES_186_1 |                        | 93043                   | 61686                  | 16  | 16    | 1,35    | 2,08       | 0,49   |
|              |             | BES_186_2 |                        | 97597                   | 64010                  | 35  | 35    | 1,87    | 2,98       | 0,53   |
|              |             | BES_186_3 |                        | 85616                   | 54205                  | 17  | 17    | 2,11    | 5,01       | 0,74   |
|              |             | BES_81_1  | T35                    | 163890                  | 101377                 | 19  | 19    | 2,06    | 5,55       | 0,70   |
|              |             | BES_81_2  |                        | 59051                   | 45948                  | 28  | 28    | 2,13    | 5,65       | 0,64   |
|              |             | BES_81_3  |                        | 63755                   | 51330                  | 32  | 32    | 2,44    | 6,95       | 0,70   |
|              |             | BES_69_1  | T42                    | 48415                   | 41031                  | 2   | 2     | 0,67    | 1,92       | 0,97   |
|              |             | BES_69_2  |                        | 52180                   | 37590                  | 1   | 1     | 0,00    | 1,00       | NA     |
|              |             | BES_69_3  |                        | 58107                   | 52689                  | 1   | 1     | 0,00    | 1,00       | NA     |
|              |             | BES_72_1  |                        | 65663                   | 52755                  | 15  | 15    | 2,18    | 6,82       | 0,80   |
|              |             | BES_72_2  |                        | 37286                   | 32172                  | 30  | 30    | 2,69    | 9,20       | 0,79   |
|              |             | BES_72_3  |                        | 51531                   | 43486                  | 30  | 30    | 2,74    | 10,26      | 0,81   |
|              |             | BES_135_1 | T63                    | 80229                   | 42443                  | 28  | 28    | 2,64    | 9,12       | 0,79   |
|              |             | BES_135_2 |                        | 180185                  | 129093                 | 32  | 32    | 3,06    | 16,42      | 0,88   |
|              |             | BES_135_3 |                        | 142154                  | 83882                  | 16  | 16    | 2,17    | 6,77       | 0,78   |
|              |             | BES_138_1 |                        | 191129                  | 128715                 | 26  | 26    | 2,68    | 9,99       | 0,82   |

|  |  |           |      |        |        |    |    |      |       |      |
|--|--|-----------|------|--------|--------|----|----|------|-------|------|
|  |  | BES_138_2 |      | 141682 | 79712  | 31 | 31 | 2,61 | 8,82  | 0,76 |
|  |  | BES_123_1 | T70  | 117004 | 70513  | 23 | 23 | 2,37 | 8,31  | 0,76 |
|  |  | BES_123_2 |      | 66388  | 50479  | 30 | 30 | 2,69 | 10,18 | 0,79 |
|  |  | BES_123_3 |      | 63325  | 41740  | 39 | 39 | 3,12 | 15,50 | 0,85 |
|  |  | BES_126_1 |      | 129134 | 80625  | 22 | 22 | 2,26 | 6,39  | 0,73 |
|  |  | BES_126_2 |      | 95771  | 58636  | 25 | 25 | 1,89 | 3,75  | 0,59 |
|  |  | BES_126_3 |      | 149330 | 87682  | 33 | 33 | 2,15 | 4,20  | 0,61 |
|  |  | BES_192_1 | T91  | 122135 | 65180  | 7  | 7  | 1,78 | 5,72  | 0,91 |
|  |  | BES_192_2 |      | 145190 | 87249  | 21 | 21 | 1,85 | 4,44  | 0,61 |
|  |  | BES_192_3 |      | 122371 | 78407  | 20 | 20 | 2,41 | 8,98  | 0,81 |
|  |  | BES_177_1 | T98  | 47651  | 29569  | 13 | 13 | 1,56 | 2,94  | 0,61 |
|  |  | BES_177_2 |      | 85248  | 49891  | 11 | 11 | 2,06 | 7,26  | 0,86 |
|  |  | BES_177_3 |      | 81771  | 51856  | 8  | 8  | 1,74 | 4,74  | 0,84 |
|  |  | BES_180_1 |      | 96309  | 58190  | 23 | 23 | 2,24 | 5,24  | 0,72 |
|  |  | BES_180_2 |      | 109233 | 71510  | 24 | 24 | 1,96 | 3,56  | 0,62 |
|  |  | BES_180_3 |      | 91251  | 58699  | 21 | 21 | 2,11 | 4,20  | 0,69 |
|  |  | BES_222_1 | T140 | 126467 | 76056  | 17 | 17 | 2,10 | 6,05  | 0,74 |
|  |  | BES_222_2 |      | 154936 | 101944 | 11 | 11 | 1,27 | 2,28  | 0,53 |
|  |  | BES_222_3 |      | 114890 | 75281  | 7  | 7  | 1,07 | 2,07  | 0,55 |
|  |  | BES_207_1 | T147 | 87096  | 50484  | 7  | 7  | 1,14 | 2,17  | 0,58 |
|  |  | BES_207_2 |      | 112400 | 70220  | 8  | 8  | 0,45 | 1,23  | 0,21 |
|  |  | BES_207_3 |      | 114806 | 70037  | 9  | 9  | 1,09 | 1,85  | 0,49 |
|  |  | BES_210_1 |      | 89237  | 53171  | 40 | 40 | 2,81 | 10,42 | 0,76 |
|  |  | BES_210_2 |      | 107606 | 69039  | 20 | 20 | 1,55 | 2,39  | 0,52 |
|  |  | BES_210_3 |      | 145620 | 89600  | 25 | 25 | 1,16 | 1,80  | 0,36 |

|        |     |            |      |        |        |     |       |      |       |      |
|--------|-----|------------|------|--------|--------|-----|-------|------|-------|------|
| Toulon | PVC | TLN_T1_1   | T1   | 122336 | 79288  | 39  | 39    | 2,14 | 3,49  | 0,58 |
|        |     | TLN_T1_2   |      | 131120 | 90689  | 38  | 38    | 1,60 | 2,15  | 0,44 |
|        |     | TLN_T1_3   |      | 93798  | 62638  | 43  | 43    | 2,35 | 3,96  | 0,62 |
|        |     | TLN_T4_1   | T4   | 91189  | 55655  | 77  | 80    | 2,71 | 4,60  | 0,62 |
|        |     | TLN_T4_2   |      | 103676 | 64550  | 54  | 54    | 2,81 | 8,78  | 0,71 |
|        |     | TLN_T4_3   |      | 91124  | 59791  | 45  | 45    | 2,90 | 10,40 | 0,76 |
|        |     | TLN_T8_1   | T8   | 127417 | 90676  | 51  | 51    | 2,81 | 6,77  | 0,71 |
|        |     | TLN_T8_2   |      | 121242 | 81847  | 37  | 37    | 2,69 | 7,99  | 0,74 |
|        |     | TLN_T8_3   |      | 112391 | 73711  | 48  | 48    | 2,76 | 8,54  | 0,71 |
|        |     | TLN_T12_1  | T12  | 309799 | 154995 | 37  | 37    | 2,52 | 5,95  | 0,70 |
|        |     | TLN_T12_2  |      | 102591 | 69456  | 42  | 42    | 2,94 | 11,65 | 0,79 |
|        |     | TLN_T12_3  |      | 116231 | 75915  | 65  | 66    | 3,09 | 10,21 | 0,74 |
|        |     | TLN_T20_1  | T20  | 82674  | 58816  | 65  | 65    | 3,35 | 15,91 | 0,80 |
|        |     | TLN_T20_2  |      | 106595 | 68623  | 51  | 51    | 2,83 | 7,60  | 0,72 |
|        |     | TLN_T20_3  |      | 86081  | 55113  | 66  | 66    | 3,07 | 9,32  | 0,73 |
|        |     | TLN_T28_1  | T28  | 112026 | 71163  | 48  | 48.33 | 3,10 | 14,18 | 0,80 |
|        |     | TLN_T28_2  |      | 99802  | 66936  | 46  | 46    | 2,97 | 11,62 | 0,78 |
|        |     | TLN_T28_3  |      | 85176  | 56948  | 42  | 42    | 2,69 | 8,08  | 0,72 |
|        |     | TLN_BIOP_1 | T30  | 104042 | 68402  | 18  | 18    | 2,33 | 6,55  | 0,81 |
|        |     | TLN_BIOP_2 |      | 68220  | 47146  | 35  | 35    | 2,82 | 10,11 | 0,79 |
|        |     | TLN_BIOP_3 |      | 648640 | 379158 | 47  | 47    | 2,97 | 11,24 | 0,77 |
|        |     | TLN_T75_1  | T75  | 107195 | 61007  | 96  | 96    | 3,65 | 22,26 | 0,80 |
|        |     | TLN_T75_2  |      | 106717 | 71004  | 110 | 110   | 3,42 | 14,19 | 0,73 |
|        |     | TLN_T75_3  |      | 103211 | 58070  | 114 | 114   | 3,65 | 21,56 | 0,77 |
|        |     | TLN_T365_1 | T365 | 93240  | 67616  | 147 | 147.6 | 4,06 | 26,48 | 0,81 |

|                  |          |            |     |        |        |     |      |      |       |      |
|------------------|----------|------------|-----|--------|--------|-----|------|------|-------|------|
|                  |          | TLN_T365_2 |     | 92818  | 55096  | 134 | 144  | 3,86 | 23,82 | 0,79 |
|                  |          | TLN_T365_3 |     | 141068 | 90068  | 119 | 119  | 4,01 | 29,82 | 0,84 |
|                  | Seawater | TLN_T0     | T0  | 116525 | 87328  | NA  | NA   | NA   | NA    | NA   |
|                  |          | TLN_T1     | T10 | 102631 | 79387  | NA  | NA   | NA   | NA    | NA   |
|                  |          | TLN_T2     | T20 | 106545 | 83494  | NA  | NA   | NA   | NA    | NA   |
|                  |          | TLN_T3     | T30 | 118170 | 82399  | 3   | 3    | 0,65 | 1,58  | 0,59 |
| Lorient          | PVC      | LRN_BIOP_1 | T30 | 118157 | 83120  | 7   | 7    | 1,20 | 2,56  | 0,62 |
|                  |          | LRN_BIOP_2 |     | 96121  | 63207  | 11  | 11   | 1,66 | 4,06  | 0,69 |
|                  |          | LRN_BIOP_3 |     | 103101 | 67343  | 5   | 5    | 1,36 | 3,45  | 0,85 |
|                  | Seawater | LRN_T0     | T0  | 81825  | 59922  | NA  | NA   | NA   | NA    | NA   |
|                  |          | LRN_T1     | T10 | 98374  | 73757  | 2   | 2    | 0,41 | 1,32  | 0,59 |
|                  |          | LRN_T2     | T20 | 102562 | 87275  | 5   | 5    | 1,20 | 2,87  | 0,75 |
|                  |          | LRN_T3     | T30 | 75181  | 51413  | NA  | NA   | NA   | NA    | NA   |
| Le Port          | PVC      | REU_BIOP_1 | T30 | 165835 | 149532 | 9   | 9    | 1,67 | 3,87  | 0,76 |
|                  |          | REU_BIOP_2 |     | 106499 | 98487  | 10  | 10   | 2,15 | 7,51  | 0,93 |
|                  |          | REU_BIOP_3 |     | 127327 | 116340 | 6   | 6    | 1,71 | 5,15  | 0,95 |
|                  | Seawater | REU_T0     | T0  | 94914  | 79756  | 1   | 1    | 0,00 | 1,00  | NA   |
|                  |          | REU_T1     | T10 | 118265 | 92241  | 2   | 2    | 0,33 | 1,22  | 0,47 |
|                  |          | REU_2      | T20 | 80458  | 62184  | 3   | 3    | 0,40 | 1,26  | 0,36 |
|                  |          | REU_T3     | T30 | 113116 | 93244  | 4   | 5    | 0,53 | 1,38  | 0,38 |
| Banyuls-Sur- Mer | PVC      | BSM_T75_1  | T75 | 86450  | 51671  | 75  | 75   | 3,26 | 12,42 | 0,76 |
|                  |          | BSM_T75_2  |     | 93422  | 57648  | 75  | 75   | 3,25 | 11,29 | 0,75 |
|                  |          | BSM_T75_3  |     | 94721  | 68121  | 79  | 79.5 | 3,25 | 10,76 | 0,74 |



**Table S4:** Number of reads before and after processing, number of ASVs, and alpha diversity index values for each sample for the ITS dataset (controlled conditions)

| Samples                |        | Incubation time (days) | Reads before processing | Reads after processing | ASV | Chao1 | Shannon | Simpson | Pielou |
|------------------------|--------|------------------------|-------------------------|------------------------|-----|-------|---------|---------|--------|
| Conventional polymers  | PEO    | 3                      | 17701                   | 4747                   | 9   | 9     | 1.35    | 2.86    | 0.62   |
|                        |        | 10                     | 12220                   | 4302                   | 8   | 8     | 1.77    | 4.87    | 0.85   |
|                        |        | 31                     | 17665                   | 7787                   | 9   | 9     | 1.54    | 3.12    | 0.70   |
|                        |        | 74                     | 13949                   | 5741                   | 4   | 4     | 0.76    | 1.59    | 0.55   |
|                        |        | 116                    | 50381                   | 20520                  | 14  | 14    | 1.06    | 1.67    | 0.40   |
|                        |        | 206                    | 17271                   | 8026                   | 7   | 7     | 1.23    | 2.63    | 0.63   |
|                        | PE-OXO | 3                      | 32170                   | 11639                  | 5   | 5     | 1.09    | 2.44    | 0.68   |
|                        |        | 10                     | 40073                   | 15809                  | 5   | 5     | 0.68    | 1.57    | 0.43   |
|                        |        | 31                     | 36633                   | 12699                  | 8   | 8     | 1.58    | 3.88    | 0.76   |
|                        |        | 74                     | 19429                   | 8295                   | 18  | 18    | 1.47    | 2.81    | 0.51   |
|                        |        | 116                    | 13355                   | 8909                   | 10  | 10    | 1.55    | 3.40    | 0.67   |
|                        |        | 206                    | 208610                  | 1383                   | 5   | 5     | 0.60    | 1.36    | 0.38   |
| Biodegradable polymers | PCL    | 3                      | 77772                   | 38166                  | 9   | 9     | 0.93    | 1.98    | 0.42   |
|                        |        | 10                     | 36928                   | 18004                  | 8   | 8     | 0.60    | 1.30    | 0.29   |
|                        |        | 31                     | 26335                   | 13137                  | 5   | 5     | 1.22    | 2.57    | 0.76   |
|                        |        | 74                     | NA                      | NA                     | NA  | NA    | NA      | NA      | NA     |
|                        |        | 116                    | 50838                   | 15500                  | 5   | 5     | 0.57    | 1.39    | 0.35   |
|                        |        | 206                    | 26636                   | 17306                  | 1   | 1     | 0       | 1       | NA     |
|                        | PHBV   | 3                      | 46223                   | 22825                  | 9   | 9     | 1.53    | 3.64    | 0.69   |

|         |           |     |        |       |    |    |      |      |      |
|---------|-----------|-----|--------|-------|----|----|------|------|------|
|         |           | 10  | 35127  | 28275 | 2  | 2  | 0.30 | 1.20 | 0.44 |
|         |           | 31  | 33155  | 15496 | 6  | 6  | 0.88 | 2.16 | 0.49 |
|         |           | 74  | NA     | NA    | NA | NA | NA   | NA   | NA   |
|         |           | 116 | 33194  | 13852 | 9  | 9  | 1.54 | 3.97 | 0.70 |
|         |           | 206 | NA     | NA    | NA | NA | NA   | NA   | NA   |
| Control | Sea water | 3   | 18156  | 9313  | 25 | 25 | 2.10 | 4.94 | 0.65 |
|         |           | 10  | 16875  | 5699  | 14 | 14 | 2.18 | 6.92 | 0.83 |
|         |           | 31  | 179093 | 69    | 5  | 5  | 2.10 | 4.94 | 0.65 |

Supplementary figures :

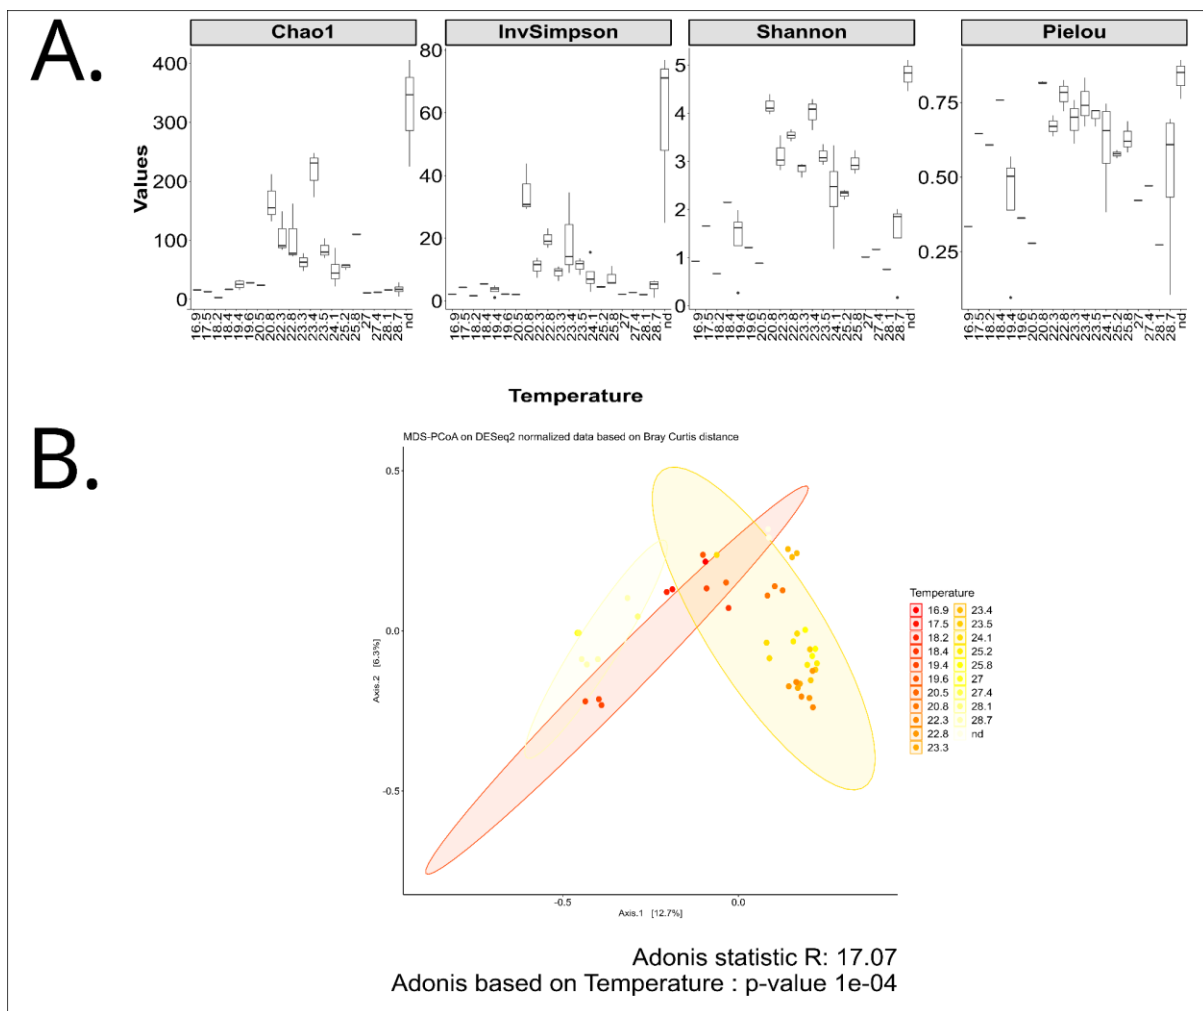

**Supp. Figure S1:** Significance of alpha diversity indices for the variable (A) "Temperature". (B) PCoA demonstrating the relationship between fungal community composition similarity and the variable "Temperature" based on the ITS dataset in Toulon (temperature range between 16.9 and 25.2°C), Banyuls-sur-mer (temperature of 20.8°C), Lorient (temperature range between 17.5 and 19.4°C) and Le Port (temperature range between 27.0 and 28.7°C).

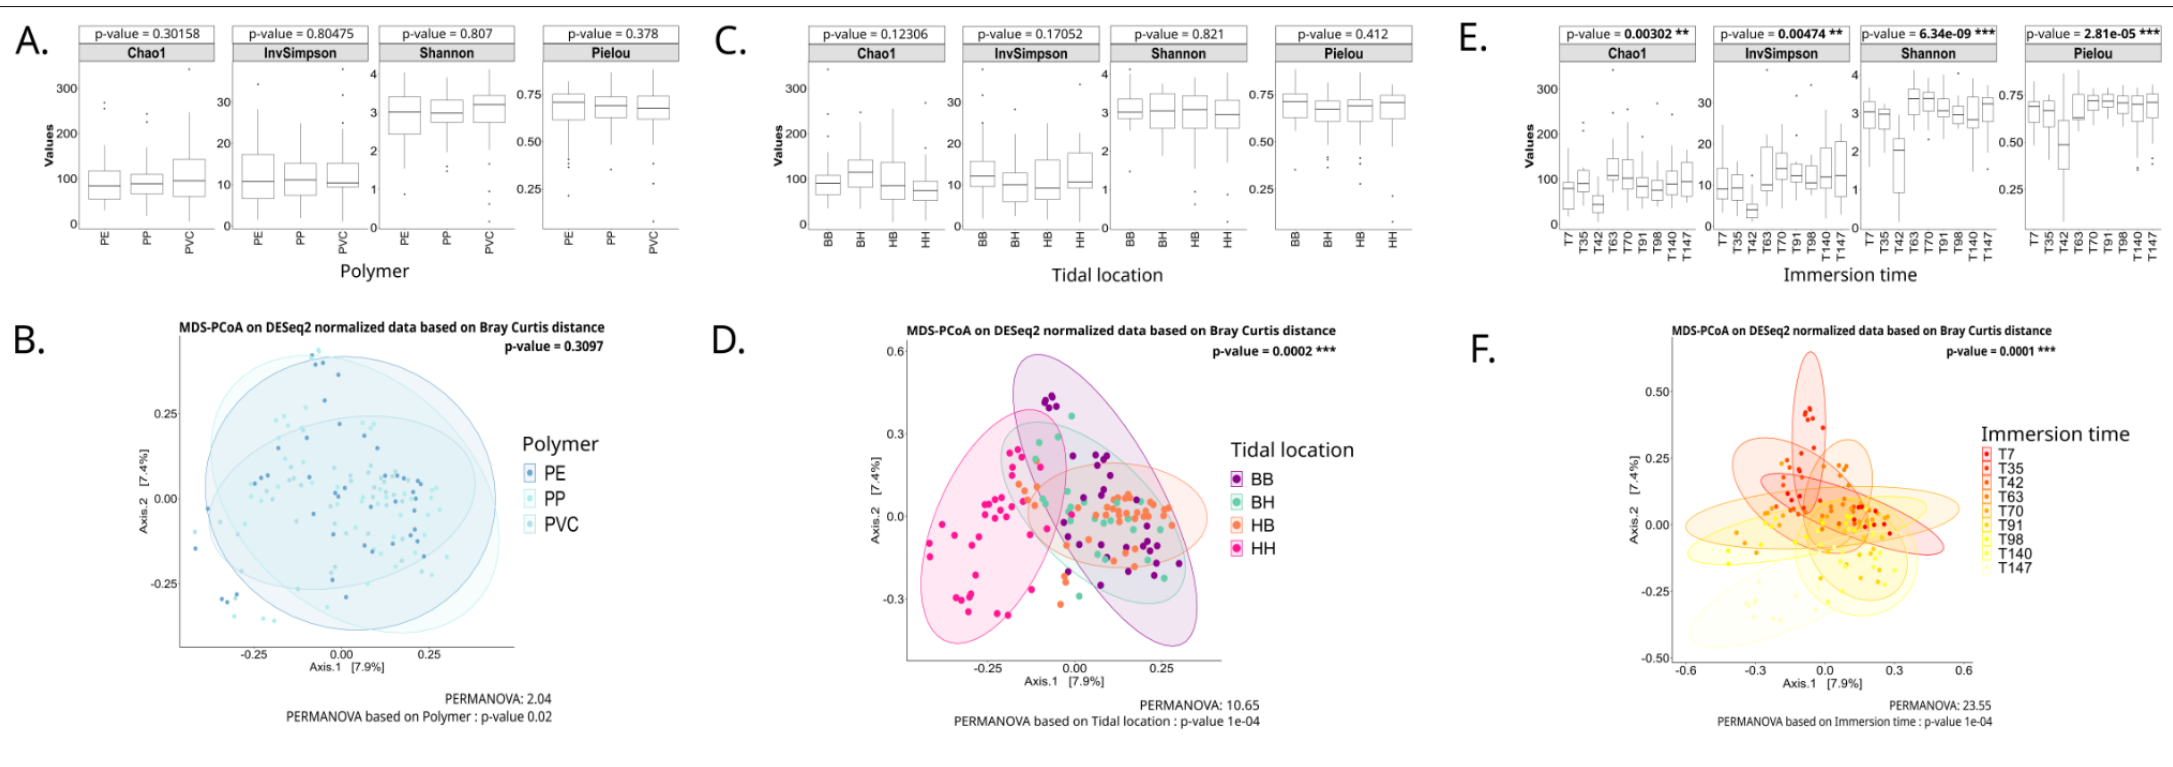

**Supp. Figure S2:** Significance of alpha diversity indices for the variables (A) "Polymers", (C) "Tidal location", and (E) "Immersion time". PCoA demonstrating the relationship between fungal community composition similarity and the variables (B) "Polymers", (D) "Tidal location", and (F) "Immersion time" (days) based on the ITS dataset in Brest. **Meaning of tidal location acronyms:** BB (Subtidal water-sediment interface), BH (Subtidal water surface), HB (Intertidal water-sediment interface) and HH (Intertidal water column).

A.

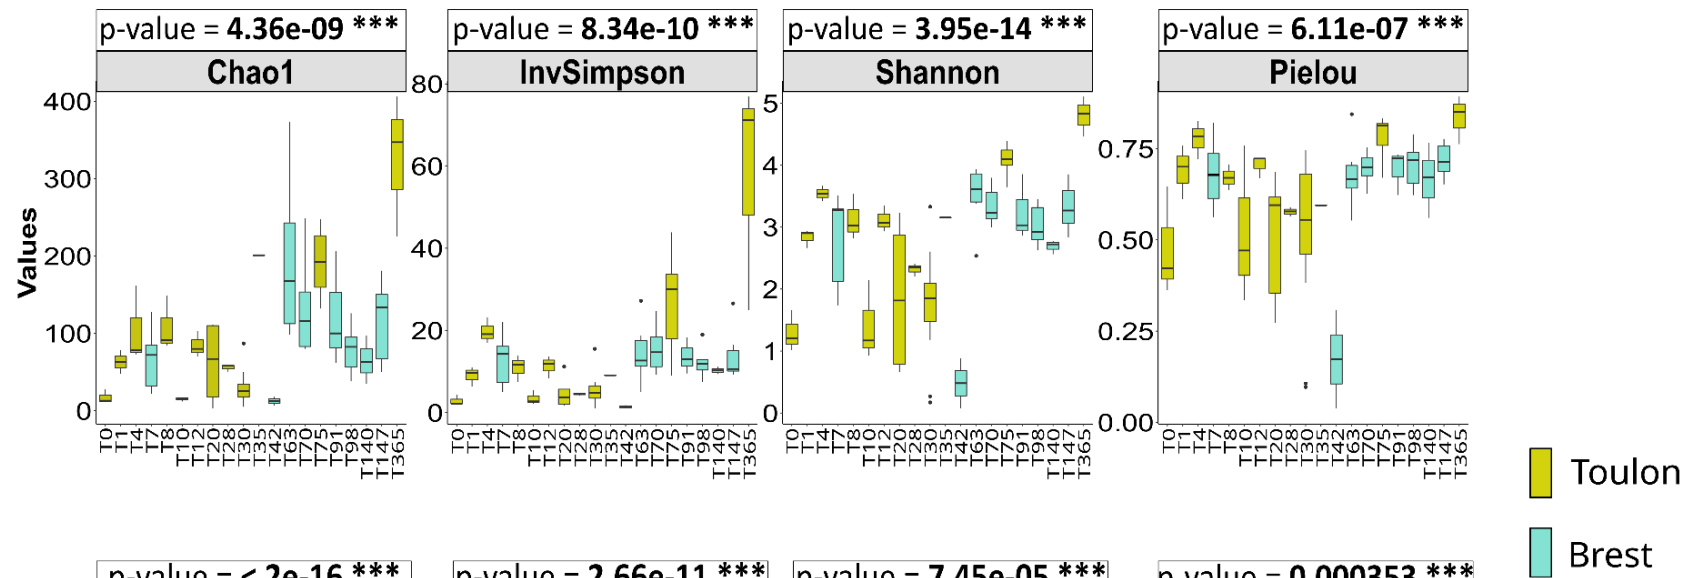

B.

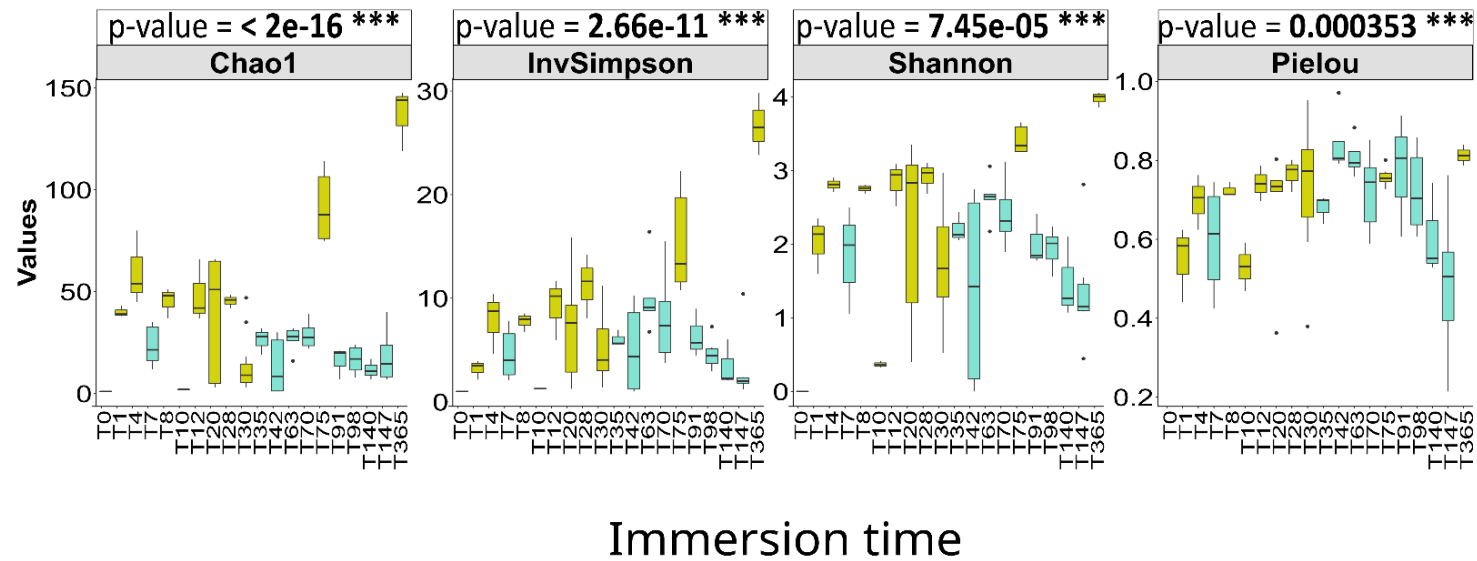

Supp. Figure S3 : Alpha diversity indices and their associated significance, based on the ITS2 (A) and the V4 hypervariable region of the 18S rRNA gene (B) datasets for the variable “Immersion time” (days).
